# Supplementary material
Source: PubMed Central journal article supplement (PMC3744236)
Supplement: NIHMS354970-supplement-Supplementary_data.pdf [file NIHMS354970-supplement-Supplementary_data.pdf]

Supporting Information for

# **A digital microfluidic droplet generator produces self-assembled supramolecular nanoparticles for targeted cell imaging**

Kan Liu<sup>1-7</sup>, Hao Wang<sup>2-7</sup>, Kuan-Ju Chen<sup>2-5</sup>, Feng Guo<sup>2-5</sup>, Wei-Yu Lin<sup>2-5</sup>, Yi-Chun Chen<sup>2-5</sup>, Duy Linh Phung<sup>2-5</sup>, Hsian-Rong Tseng<sup>2-5,7</sup> and Clifton K.-F. Shen<sup>2-4,7</sup>

<sup>1</sup> College of Electronics and Information Engineering, Wuhan Textile University, Wuhan, 430073, China

<sup>2</sup> Department of Molecular and Medical Pharmacology, David Geffen School of Medicine at University of California, Los Angeles, 23-120 Center for Health Science, Los Angeles, California 90095, USA

<sup>3</sup> Crump Institute for Molecular Imaging, 570 Westwood Plaza, Los Angeles, California 90095, USA

<sup>4</sup> California Nanosystems Institute, 570 Westwood Plaza, Los Angeles, California 90095, USA

<sup>5</sup> Institute for Molecular Medicine, University of California, Los Angeles, CA 90095, USA

<sup>6</sup> These authors contributed equally to this study

<sup>7</sup> Correspondence and reprint requests should be addressed to K.L. ([liukan2002@gmail.com](mailto:liukan2002@gmail.com)), H.W. ([haowangkevin@gmail.com](mailto:haowangkevin@gmail.com)), H.-R.T. ([HRTseng@mednet.ucla.edu](mailto:HRTseng@mednet.ucla.edu)), or C.K.-F.S. ([kshen@mednet.ucla.edu](mailto:kshen@mednet.ucla.edu))

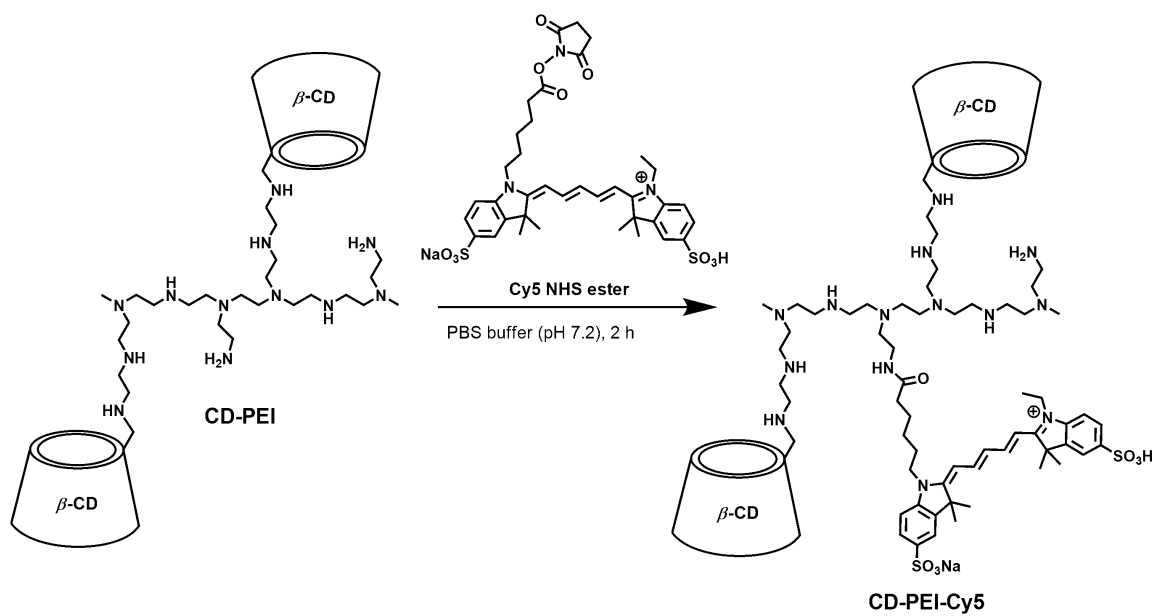

**Figure S1** Synthesis of CD-PEI-Cy5 4 in PBS buffer (pH 7.2) at room temperature.

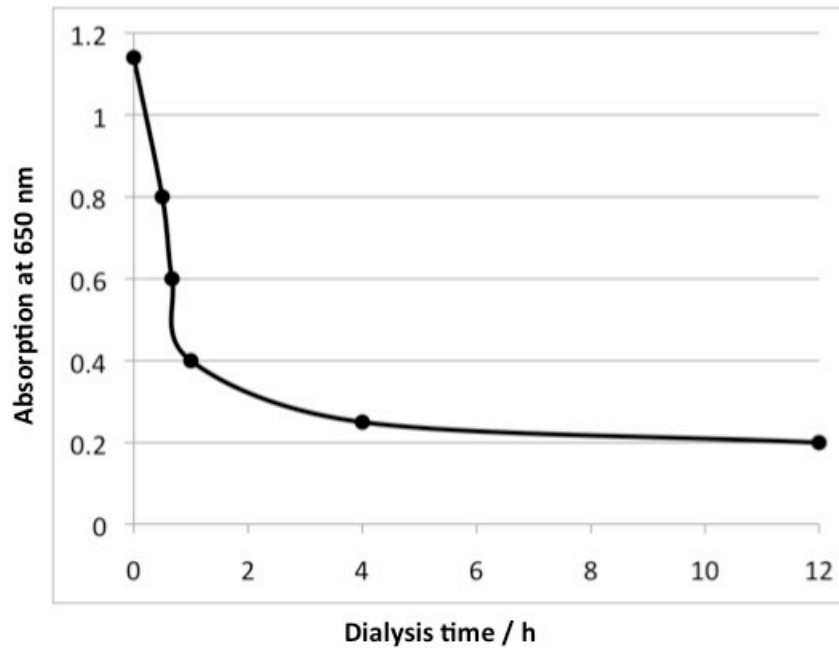

**Figure S2** The UV/vis absorption of CD-PEI-Cy5 4 solution (at 650 nm) in the dialysis cassette (from 0 to 12h).

The SNPs synthesized by digital microfluidic droplet generator (DMDG) and conventional mixing with micropipettes manually are characterized by TEM and DLS. The TEM images showed the spherical morphology of SNPs in both cases. The size distribution data of SNPs synthesized by DMDG and conventional manual mixing are summarized in the **Table S1** for comparison.

**Table S1** TEM and DLS Analyses of SNP size distribution.

|                                  | DMDG       |              | Manual Mixing <sup>a</sup> |          |
|----------------------------------|------------|--------------|----------------------------|----------|
| Ad-PAMAM/CD-PEI ratios (mol/mol) | TEM (nm)   | DLS (nm)     | TEM (nm)                   | DLS (nm) |
| 0.5                              | 36.7 ± 5.7 | 36.0 ± 4.9   | 32 ± 7                     | 38 ± 9   |
| 1.5                              | 110 ± 9.2  | 121 ± 11.9   | 104 ± 16                   | 115 ± 15 |
| 2.5                              | 148 ± 9.5  | 182 ± 16.2   | N/A                        | N/A      |
| 4                                | 344 ± 15.3 | 443.0 ± 21.3 | 340 ± 46                   | 378 ± 27 |

<sup>a</sup> Wang H, Wang S T, Su H, Chen K J, Armijo A L, Lin W Y, Wang Y J, Sun J, Kamei K, Czernin J, Radu C G, and Tseng H R 2009 *Angew. Chem. Int. Ed.* **48** 4344–48.
